# Supplementary material for: Amperometric Biosensor for Quantitative Measurement Using Sandwich Immunoassays
Source: Biosensors (Basel). 2023 May 5;13(5):519. doi: 10.3390/bios13050519 (PMC10216821; doi:10.3390/bios13050519)
Supplement: Supplementary file 1 [file biosensors-13-00519-s001.zip › biosensors-2352741-supplementary.pdf]

## Supporting Information:

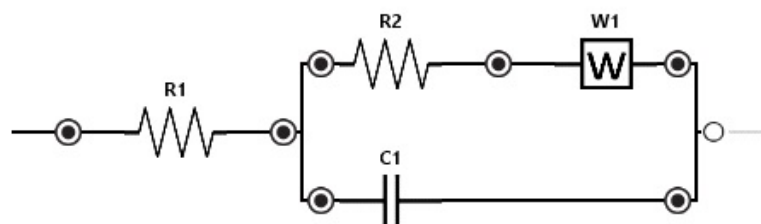

**Figure S1.** Randles circuit used for fitting electrochemical characterization EIS data.

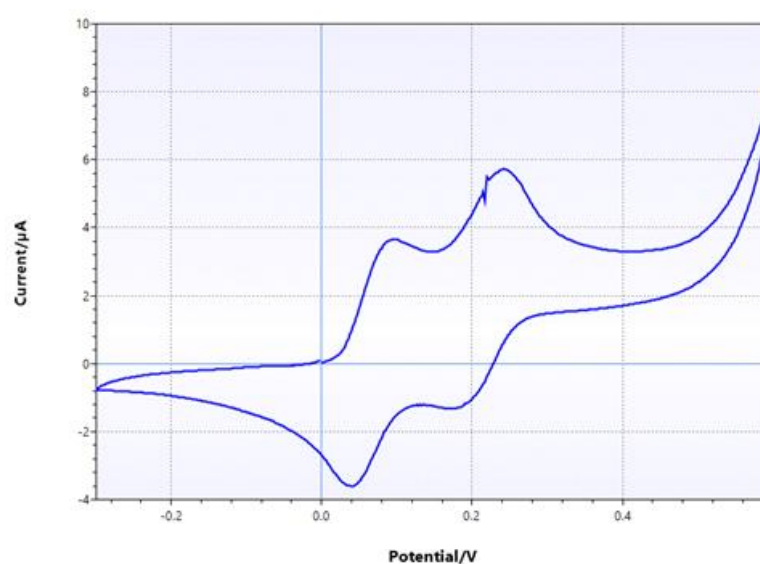

**Figure S2.** Cyclic voltammogram of 1-Step Turbo TMB-ELISA Substrate Solution on a blank 220BT electrode.

Figure S2 shows the cyclic voltammetry data of the 1-Step Turbo TMB-ELISA Substrate Solution on a blank 220BT electrode. As seen in the figure TMB is an electrochemical active molecule with 2 oxidation and reduction peaks, 1 pair is situated around 0.06 V and the other around 0.2 V. The first pair represents TMB/TMB<sup>+</sup> while the second is TMB<sup>+</sup>/TMB<sup>2+</sup>. To use the TMB molecules as electron mediators and link them to a specific concentration it is critical to ensure no electrochemical oxidation takes place and only the enzymatic reaction with HRP, H<sub>2</sub>O<sub>2</sub> and TMB is contributing to the electrochemical signal. Therefore, the potential used in chronoamperometry needs to be below the formal potential of the TMB/TMB<sup>+</sup> redox reaction. As it can be seen from Figure S2 a potential of 0.0 V satisfies this requirement.

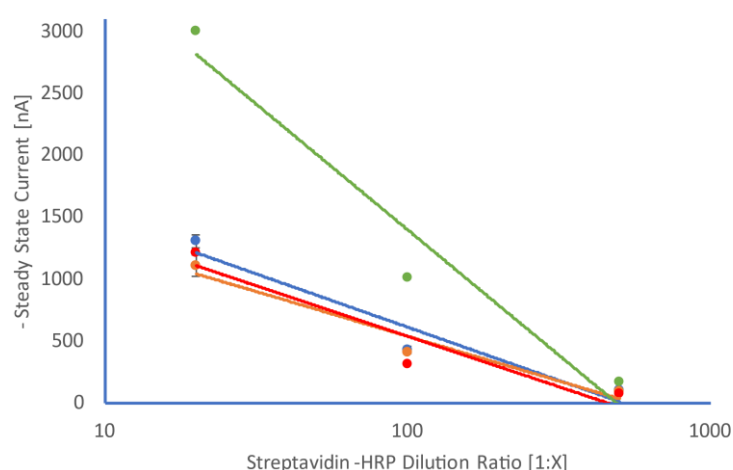

**Figure S3.** Log-linear plot of steady state current vs. Strep-HRP dilution ratio using different immunosensors. The blue, orange, red and green lines are logarithmic fits using MUA/BAF1757/PVA, MUA/BAM/PVA, MUA/BAF1757/Cyst/PEGDA and MUA/BAF293/Cyst/PEGDA immunosensors respectively. All sensors used here were fabricated using 220BT electrodes except for MUA/BAF1757/Cyst/PEGDA (red) which used ItalSens.

Figure S3 shows the results from additional experiments with Strep-HRP dilution series in a log-linear plot. As shown immunosensors with three different immobilized antibodies, two different blocking methods, and two electrode types show a dependence for the Strep-HRP dilution ratio when measured using chronoamperometry. The MUA/BAF1757/PVA and MUA/BAM/PVA immunosensors have two replications for each concentration which gave a mean CV% of 6.6% and 5.3%, respectively.

**Table S1.** Steady state current for tested dilutions across different immunosensors.

| Electrode | Immunosensor           | Concentration | Current [nA] |
|-----------|------------------------|---------------|--------------|
| 220BT     | MUA/BAF1757/PVA        | 1:500         | 104          |
|           |                        | 1:100         | 427          |
|           |                        | 1:20          | 1307         |
|           | MUA/BAM/PVA            | 1:500         | 97           |
|           |                        | 1:100         | 413          |
|           |                        | 1:20          | 1107         |
|           | MUA/BAF293/Cyst/PEGDA  | 1:500         | 173          |
|           |                        | 1:100         | 1016         |
|           |                        | 1:20          | 3009         |
| ItalSens  | MUA/BAF1757/Cyst/PEGDA | 1:500         | 78           |
|           |                        | 1:100         | 319          |
|           |                        | 1:20          | 1220         |
